# Supplementary material for: Neuropsychiatric Factors Linked to Adherence and Short-Term Outcome in a U.S. Functional Neurological Disorders Clinic: A Retrospective Cohort Study
Source: Atypon-hosted journal article supplement (doi:10.1176/appi.neuropsych.17060117), 2017-11-14
Supplement: appi.neuropsych.17060117.ds001.pdf [file appi.neuropsych.17060117.ds001.pdf]

| <b>Supplemental Table 1.</b> Findings in 43 patients with FND that had abnormal brain scans.                                               |          |
|--------------------------------------------------------------------------------------------------------------------------------------------|----------|
| <b>Type of abnormality</b>                                                                                                                 | <b>N</b> |
| Nonspecific subcortical T2/FLAIR hyperintensities                                                                                          | 21       |
| Chronic communicating hydrocephalus with partial agenesis of corpus callosum                                                               | 1        |
| Intraventricular mass s/p resection; left frontal T2/FLAIR hyperintensities from prior ventriculostomy placement; chronic right BG infarct | 1        |
| Pineal cyst                                                                                                                                | 1        |
| Mild prominence of temporal horns in lateral ventricles                                                                                    | 1        |
| Rathke's cleft cyst                                                                                                                        | 1        |
| Left MCA stroke with T2/FLAIR hyperintensities in insular, inferior frontal and parietal regions; bilateral choroid plexus cysts           | 1        |
| Small hemorrhagic focus in the left paramedian cerebellum (possible cavernous malformation)                                                | 1        |
| Small right lentiform nucleus DVA                                                                                                          | 1        |
| Extra-axial posterior arachnoid cyst versus a mega cisterna magna                                                                          | 1        |
| Chiari II malformation s/p two VP shunts                                                                                                   | 1        |
| Right frontotemporal encephalomalacia s/p severe TBI and craniotomy                                                                        | 1        |
| Bilateral anterior cingulotomy                                                                                                             | 1        |
| Bilateral hippocampal cysts                                                                                                                | 1        |
| Left frontal meningioma s/p resection                                                                                                      | 1        |
| Chiari I malformation                                                                                                                      | 1        |
| Mild ventricular prominence                                                                                                                | 1        |
| Left acoustic schwannoma                                                                                                                   | 1        |
| Focal T2/FLAIR hyperintensity in left parietal region of unclear significance                                                              | 1        |
| DVA, location unknown                                                                                                                      | 1        |
| Small left parietal cavernous malformation                                                                                                 | 1        |
| Midline cerebellar DVA                                                                                                                     | 1        |
| 3mm ACom aneurysm                                                                                                                          | 1        |

FND, functional neurological disorder; FLAIR, fluid-attenuated inversion recovery; s/p, status-post, MCA, middle cerebral artery; DVA, developmental venous anomaly; VP, ventriculoperitoneal; ACom, anterior communicating artery.
